# Supplementary material for: Postnatal exercise interventions: a systematic review of adherence and effect
Source: HighWire-hosted journal article supplement (doi:10.1136/bmjopen-2020-044567), 2021-09-01
Supplement: bmjopen-2020-044567supp003_data_supplement.pdf [file bmjopen-2020-044567supp003_data_supplement.pdf]

**CENTRAL SEARCH STRATEGY**

1. MeSH descriptor: [Postpartum Period] explode all trees
2. MeSH descriptor: [Lactation] explode all trees
3. (postpartum period)
4. MeSH descriptor: [Peripartum Period] explode all trees
5. (peripartum period)
6. (postpartum women)
7. (post partum women)
8. ((post natal or postnatal)):ti,ab,kw
9. ((post partum or postpartum)):ti,ab,kw
10. ((post pregnancy or postpregnancy)):ti,ab,kw
11. (((Post or after or follow\*) NEXT birth\*)):ti,ab,kw
12. (((Post or after or follow\*) NEXT labo?r)):ti,ab,kw
13. (((Post or after or follow\*) NEXT childbirth\*)):ti,ab,kw
14. (((Post or after or follow\*) NEXT pregnancy)):ti,ab,kw
15. (((Post or after or follow\*) NEXT parturition)):ti,ab,kw
16. (((Post or after or follow\*) NEXT delivery)):ti,ab,kw
17. ((interpregnanc\* or inter pregnanc\* or (between NEXT pregnanc\*)):ti,ab,kw
18. ((interconception or inter conception or (between NEXT conception)):ti,ab,kw
19. (puerperium):ti,ab,kw
20. #1 or #2 or #3 or #4 or #5 #8 or #9 or #10 or #11 or #12 or #13 or #14 or #15 or #16  
or #17 or #18 or #19
21. MeSH descriptor: [Exercise] explode all trees
22. (exercise):ti,ab,kw

23. MeSH descriptor: [Exercise Therapy] explode all trees
24. MeSH descriptor: [Physical Fitness] explode all trees
25. MeSH descriptor: [Sports] explode all trees
26. MeSH descriptor: [Sports Medicine] this term only
27. MeSH descriptor: [Sports Nutritional Sciences] this term only
28. (fitness):ti,ab,kw
29. ((activit\* and program\*)):ti,ab,kw
30. ((locomotor and activit\*)):ti,ab,kw
31. ((motor and activit\*)):ti,ab,kw
32. ((structure\* and activit\*)):ti,ab,kw
33. (training\*):ti,ab,kw
34. ((therap\* and exercis\*)):ti,ab,kw
35. (physical\*):ti,ab,kw
36. ((activit\* or conditioning\* or effort\* or exert\*)):ti,ab,kw
37. #35 and #36
38. #21 or #22 or #23 or #24 or #25 or #26 or #27 or #28 or #29 or #30 or #31 or #32 or #33 or #34 or #37
39. #20 and #38

**1401**
